# Supplementary material for: Test of Ecogeographical Rules on Sparrows (Passer spp.) along the Elevation Gradient of the Himalaya in Central Nepal
Source: MDPI journal article supplement (doi:10.3390/ecologies3040034), 2022-10-14
Supplement: s1 [file s1]

## Supplementary Figure S1.

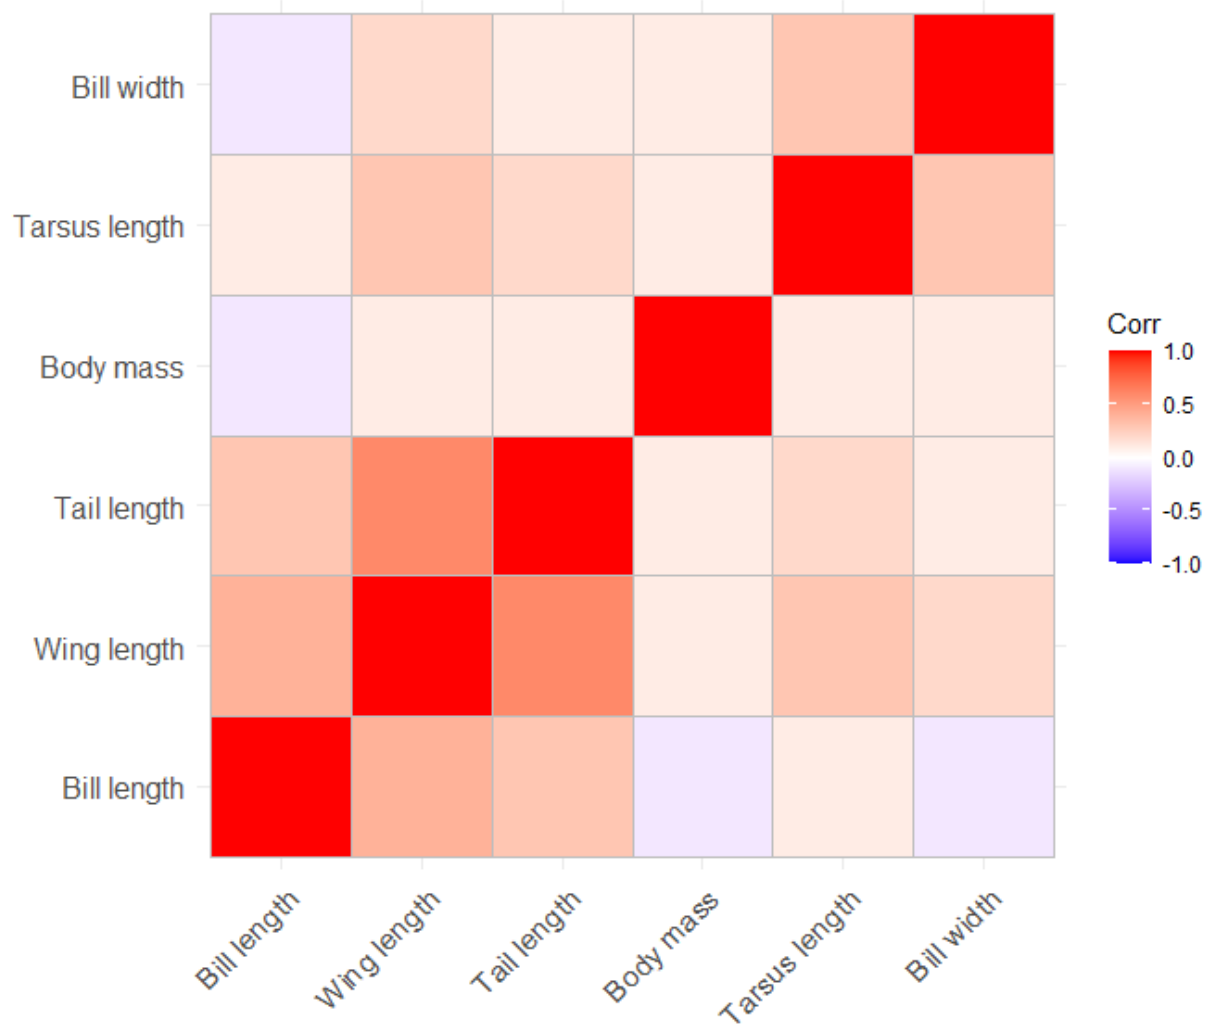

**Supplementary Figure S1.** Matrix showing pairwise correlation coefficients among the six morphological measurements of sparrows from the elevational gradient of the Himalayas in central Nepal.
